# Supplementary material for: Druggable Oncogene Fusions in Invasive Mucinous Lung Adenocarcinoma
Source: Oxford University Press journal article supplement (doi:10.1158/1078-0432.ccr-14-0107), 2014-04-12
Supplement: 10780432ccr140107-sup-tabs1-2.xlsx [file 10780432ccr140107-sup-tabs1-2.xlsx]

## Sheet: Supplementary Table S1
Supplementary Table S1. RNA sequencing of 32 IMAs
No.	Sample no.	Sample ID	Driver oncogene aberration	Library preparation kit	Quantity of RNA used for RNA sequencing (μg)	New generation sequencer	Size of pair-end reads	Novel gene fusions detected by RNA sequencing
1	BR0013DTTS01	258T	Pan-negarive	mRNA-Seq Kit	2	GAIIx	50 base PE
2	BR0056DTTS01	AD09-031T	Pan-negarive	TruSeq RNA Kit	2	HiSeq2000	50 base PE
3	BR0112DTTS01	AD08_220T	KRAS	TruSeq RNA Kit	1	GAIIx	75 base PE
4	BR0174DTTS01	301T	Pan-negarive	TruSeq RNA Kit	1	GAIIx	75 base PE	CD74-NRG1
5	BR0175DTTS01	AD08_127T	Pan-negarive	TruSeq RNA Kit	1	GAIIx	75 base PE	TRIM24-BRAF
6	BR0176DTTS01	AD09-398T	Pan-negarive	TruSeq RNA Kit	1	GAIIx	75 base PE
7	BR0177DTTS01	AD12-113T	Pan-negarive	TruSeq RNA Kit	1	GAIIx	75 base PE
8	BR0178DTTS01	AD12-119T	Pan-negarive	TruSeq RNA Kit	1	GAIIx	75 base PE	KIAA1468-RET
9	BR0179DTTS01	AD12-121T	KRAS	TruSeq RNA Kit	1	GAIIx	75 base PE
10	BR0180DTTS01	AD12-127T	KRAS	TruSeq RNA Kit	1	GAIIx	75 base PE
11	BR0181DTTS01	AD12-129T	Pan-negarive	TruSeq RNA Kit	1	GAIIx	75 base PE
12	BR0182DTTS01	310T	Pan-negarive	TruSeq RNA Kit	1	GAIIx	75 base PE
13	BR0183DTTS01	436T	Pan-negarive	TruSeq RNA Kit	1	GAIIx	75 base PE	EZR-ERBB4
14	BR0184DTTS01	AD09-231T	KRAS	TruSeq RNA Kit	1	GAIIx	75 base PE
15	BR0185DTTS01	AD09-303T	Pan-negarive	TruSeq RNA Kit	1	GAIIx	75 base PE
16	BR0186DTTS01	AD09-317T	KRAS	TruSeq RNA Kit	1	GAIIx	75 base PE
17	BR0187DTTS01	AD12-108T	Pan-negarive	TruSeq RNA Kit	1	GAIIx	75 base PE	CD74-NRG1
18	BR0188DTTS01	AD12-111T	Pan-negarive	TruSeq RNA Kit	1	GAIIx	75 base PE
19	BR0189DTTS01	AD12-112T	Pan-negarive	TruSeq RNA Kit	1	GAIIx	75 base PE
20	BR0190DTTS01	AD12-114T	Pan-negarive	TruSeq RNA Kit	1	GAIIx	75 base PE
21	BR0191DTTS01	AD12-120T	Pan-negarive	TruSeq RNA Kit	1	GAIIx	75 base PE
22	BR0192DTTS01	AD12-126T	Pan-negarive	TruSeq RNA Kit	1	GAIIx	75 base PE
23	BR0214DTTS01	AD13-121T	Pan-negarive	TruSeq RNA Kit	1	GAIIx	75 base PE
24	BR0215DTTS01	AD13-199T	Pan-negarive	TruSeq RNA Kit	1	GAIIx	75 base PE	CD74-NRG1
25	BR0216DTTS01	AD13-223T	Pan-negarive	TruSeq RNA Kit	1	GAIIx	75 base PE	CD74-NRG1
26	BR0217DTTS01	AD13-227T	Pan-negarive	TruSeq RNA Kit	1	GAIIx	75 base PE
27	BR0218DTTS01	AD13-257T	Pan-negarive	TruSeq RNA Kit	1	GAIIx	75 base PE
28	BR0219DTTS01	AD13-362T	Pan-negarive	TruSeq RNA Kit	1	GAIIx	75 base PE
29	BR0220DTTS01	AD13-364T	Pan-negarive	TruSeq RNA Kit	1	GAIIx	75 base PE
30	BR0222DTTS01	AD13-373T	Pan-negarive	TruSeq RNA Kit	1	GAIIx	75 base PE
31	BR0223DTTS01	AD13-377T	Pan-negarive	TruSeq RNA Kit	1	GAIIx	75 base PE
32	BR0224DTTS01	AD13-379T	Pan-negarive	TruSeq RNA Kit	1	GAIIx	75 base PE	SLC3A2-NRG1

## Sheet: Supplementary Table S2
Supplementary Table S2. PCR Primers used for RT-PCR screening
Gene fusion	Forward primer	Reverse primer	RT-PCR product size (bp)
CD74-NRG1	CGGAGAACCTGAGACACCTT	ACTCCCCTCCATTCACACAG	285 and 222 for (C8; N6) and (C6; N6), respectively
SLC3A2-NRG1	CAGAAGGATGATGTCGCTCA	ACTCCCCTCCATTCACACAG	184
EZR-ERBB4	AAGGAGGAGCTGGAGAGACA	CACCTGAGCCAAGGACTTTT	250
TRIM24-BRAF	TGTCGAGACTGTCAGTTGTTAGAA	GCCCAAATTGATTTCGATGA	250
KIAA1468-RET	TGTCTCCTGCATTCCATCAA	TCCAAATTCGCCTTCTCCTA	239
